# Supplementary material
Source: PubMed Central journal article supplement (PMC7102549)
Supplement: mmc1.pdf [file mmc1.pdf]

Supplementary Table 1.

| Patient | Age (years) | Sex | Clinical status | Time between onset of symptoms and inclusion (days) | Hydroxychloroquine treatment | Hydroxychloroquine serum concentration µg/ml (day of dosage) | Azithromycin treatment | D0  | D1  | D2  | D3  | D4  | D5  | D6  |
|---------|-------------|-----|-----------------|-----------------------------------------------------|------------------------------|--------------------------------------------------------------|------------------------|-----|-----|-----|-----|-----|-----|-----|
| 1       | 10          | M   | Asymptomatic    | -                                                   | No                           | -                                                            | No                     | 31  | NEG | NEG | NEG | NEG | NEG | NEG |
| 2       | 12          | F   | Asymptomatic    | -                                                   | No                           | -                                                            | No                     | 26  | ND  | 33  | 34  | NEG | 34  | NEG |
| 3       | 14          | F   | Asymptomatic    | -                                                   | No                           | -                                                            | No                     | 26  | 31  | 23  | 22  | 27  | NEG | 26  |
| 4       | 10          | M   | Asymptomatic    | -                                                   | No                           | -                                                            | No                     | 24  | NEG | 33  | 33  | NEG | NEG | 32  |
| 5       | 20          | M   | URTI            | 4                                                   | No                           | -                                                            | No                     | 24  | 24  | 24  | 27  | NEG | 31  | 29  |
| 6       | 65          | F   | URTI            | 2                                                   | No                           | -                                                            | No                     | POS | ND  | POS | ND  | POS | ND  | POS |
| 7       | 46          | M   | URTI            | Unknown                                             | No                           | -                                                            | No                     | 28  | ND  | ND  | ND  | 26  | ND  | 30  |
| 8       | 69          | M   | LRTI            | 2                                                   | No                           | -                                                            | No                     | POS |
| 9       | 62          | F   | LRTI            | 10                                                  | No                           | -                                                            | No                     | POS | ND  | POS | ND  | POS | ND  | POS |
| 10      | 66          | F   | URTI            | 0                                                   | No                           | -                                                            | No                     | POS | ND  | POS | ND  | POS | ND  | POS |
| 11      | 75          | F   | URTI            | 3                                                   | No                           | -                                                            | No                     | POS | ND  | POS | ND  | POS | ND  | POS |
| 12      | 23          | F   | URTI            | 5                                                   | No                           | -                                                            | No                     | POS | ND  | POS | ND  | POS | ND  | POS |
| 13      | 45          | F   | URTI            | Unknown                                             | No                           | -                                                            | No                     | POS | ND  | POS | ND  | POS | ND  | POS |
| 14      | 16          | M   | URTI            | 2                                                   | No                           | -                                                            | No                     | POS | ND  | ND  | POS | ND  | POS | POS |
| 15      | 42          | F   | URTI            | 5                                                   | No                           | -                                                            | No                     | ND  | POS | ND  | POS | ND  | POS | POS |
| 16      | 23          | F   | URTI            | 6                                                   | No                           | -                                                            | No                     | ND  | POS | ND  | POS | ND  | POS | POS |
| 17      | 44          | F   | URTI            | 6                                                   | Yes                          | 0.519 (D6)                                                   | No                     | 30  | ND  | 29  | 26  | 32  | 26  | 31  |
| 18      | 54          | M   | Asymptomatic    | -                                                   | Yes                          | 0.462 (D6)                                                   | No                     | 29  | NEG | NEG | NEG | NEG | NEG | NEG |
| 19      | 25          | M   | URTI            | 3                                                   | Yes                          | 0.419 (D6)                                                   | No                     | 23  | 25  | 28  | 25  | NEG | NEG | NEG |
| 20      | 59          | F   | Asymptomatic    | -                                                   | Yes                          | 0.288 (D4)                                                   | No                     | 30  | NEG | NEG | NEG | NEG | NEG | NEG |
| 21      | 49          | F   | URTI            | 1                                                   | Yes                          | 0.621 (D6)                                                   | No                     | 34  | 27  | 19  | 16  | 34  | 24  | 22  |
| 22      | 24          | F   | URTI            | 10                                                  | Yes                          | 0.723 (D6)                                                   | No                     | 28  | NEG | 32  | 34  | NEG | NEG | NEG |
| 23      | 81          | F   | LRTI            | 2                                                   | Yes                          | 0.591 (D6)                                                   | No                     | 22  | 21  | 30  | NEG | 32  | 28  | NEG |
| 24      | 85          | F   | LRTI            | 1                                                   | Yes                          | 0.619 (D6)                                                   | No                     | 17  | 21  | 23  | 21  | 26  | 24  | 24  |
| 25      | 40          | M   | URTI            | 3                                                   | Yes                          | 0.418 (D6)                                                   | No                     | 22  | ND  | 28  | 21  | 15  | 20  | 17  |
| 26      | 53          | M   | URTI            | 5                                                   | Yes                          | 0.515 (D6)                                                   | No                     | 27  | 28  | 32  | 31  | NEG | NEG | NEG |
| 27      | 63          | F   | URTI            | 8                                                   | Yes                          | 0.319 (D4)                                                   | No                     | 34  | NEG | 30  | NEG | NEG | NEG | NEG |
| 28      | 42          | F   | URTI            | 1                                                   | Yes                          | 0.453 (D6)                                                   | No                     | 19  | 16  | 17  | 17  | 19  | 20  | 31  |
| 29      | 87          | F   | URTI            | 5                                                   | Yes                          | 0.557 (D6)                                                   | No                     | 25  | 30  | NEG | NEG | NEG | ND  | ND  |
| 30      | 33          | M   | URTI            | 2                                                   | Yes                          | 0.194 (D2)                                                   | No                     | 15  | 23  | 26  | 26  | NF  | 32  | 32  |
| 31      | 53          | F   | LRTI            | 7                                                   | Yes                          | 1.076 (D6)                                                   | Yes                    | 28  | 31  | 34  | NEG | 34  | NEG | NEG |
| 32      | 48          | M   | URTI            | 2                                                   | Yes                          | 0.57 (D6)                                                    | Yes                    | 23  | 29  | 29  | NEG | NEG | NEG | NEG |
| 33      | 50          | F   | LRTI            | 5                                                   | Yes                          | 0.827 (D6)                                                   | Yes                    | 30  | 27  | NEG | NEG | NEG | NEG | NEG |
| 34      | 20          | M   | URTI            | 2                                                   | Yes                          | 0.381 (D6)                                                   | Yes                    | 27  | 31  | 29  | NEG | NEG | NEG | NEG |
| 35      | 54          | M   | LRTI            | 6                                                   | Yes                          | 0.366 (D4)                                                   | Yes                    | 24  | ND  | ND  | 29  | NEG | NEG | NEG |
| 36      | 60          | M   | LRTI            | 4                                                   | Yes                          | 0.319 (D4)                                                   | Yes                    | 29  | 31  | 31  | NEG | NEG | NEG | NEG |

URTI: upper tract respiratory infection, LRTI: lower tract respiratory infection, POS: positive PCR, NEG: negative PCR (CT value  $\geq 35$ ), ND: PCR not done
